# Supplementary material
Source: PubMed Central journal article supplement (PMC6594100)
Supplement: NIHMS1028672-supplement-SupplMat.pdf [file NIHMS1028672-supplement-SupplMat.pdf]

In the format provided by the authors and unedited.

# Biomanufacturing for clinically advanced cell therapies

**Ayesha Aijaz<sup>1,12</sup>, Matthew Li<sup>2,12</sup>, David Smith<sup>3,12</sup>, Danika Khong<sup>2</sup>, Courtney LeBlon<sup>3</sup>, Owen S. Fenton<sup>4</sup>, Ronke M. Olabisi<sup>1</sup>, Steven Libutti<sup>5</sup>, Jay Tischfield<sup>6</sup>, Marcela V. Maus<sup>7</sup>, Robert Deans<sup>8</sup>, Rita N. Barcia<sup>9</sup>, Daniel G. Anderson<sup>4</sup>, Jerome Ritz<sup>10,11</sup>, Robert Preti<sup>3</sup> and Biju Parekkadan<sup>1,2,9,11\*</sup>**

<sup>1</sup>Department of Biomedical Engineering, Rutgers University, Piscataway, NJ, USA. <sup>2</sup>Department of Surgery, Center for Surgery, Innovation, and Bioengineering, Massachusetts General Hospital, Harvard Medical School and Shriners Hospitals for Children, Boston, MA, USA. <sup>3</sup>Hitachi Chemical Advanced Therapeutics Solutions, Allendale, NJ, USA. <sup>4</sup>Department of Chemical Engineering, Institute for Medical Engineering and Science, Division of Health Science and Technology, and the David H. Koch Institute for Integrative Cancer Research, Massachusetts Institute of Technology, Cambridge, MA, USA. <sup>5</sup>Cancer Institute of New Jersey, New Brunswick, NJ, USA. <sup>6</sup>Human Genetics Institute of New Jersey, RUCDR, Piscataway, NJ, USA. <sup>7</sup>Cellular Immunotherapy Program, Cancer Center, Massachusetts General Hospital, Harvard Medical School, Charlestown, MA, USA. <sup>8</sup>BlueRock Therapeutics, Cambridge, MA, USA. <sup>9</sup>Sentien Biotechnologies, Inc, Lexington, MA, USA. <sup>10</sup>Cell Manipulation Core Facility, Dana-Farber Cancer Institute, Harvard Medical School, Boston, MA, USA. <sup>11</sup>Harvard Stem Cell Institute, Cambridge, MA, USA. <sup>12</sup>These authors contributed equally: Ayesha Aijaz, Matthew Li, David Smith. \*e-mail: [biju\\_parekkadan@hms.harvard.edu](mailto:biju_parekkadan@hms.harvard.edu)

## Supplementary Information

| <b>Content</b>                                                                                                                                                                                                           | <b>Page</b> |
|--------------------------------------------------------------------------------------------------------------------------------------------------------------------------------------------------------------------------|-------------|
| Supplementary Table 1. Cell Therapy Phase III conversion rates                                                                                                                                                           | <b>2</b>    |
| Supplementary Table 2. Regulatory reference summary for cell therapy manufacturing.                                                                                                                                      | <b>3</b>    |
| Supplementary Table 3: Descriptive summary of quality attributes for cell therapy products                                                                                                                               | <b>4</b>    |
| Supplementary Table 4. Examples of Cell Therapeutics and Their Corresponding Potency Testing                                                                                                                             | <b>5</b>    |
| Supplementary Table 5. Current challenges associated with the integration of microcarriers into MSC manufacturing.                                                                                                       | <b>6–7</b>  |
| Supplementary Table 6. Integration of lead materials candidates with high throughput methods of producing encapsulated cells; establishing comparison of microencapsulation techniques, materials and their scalability. | <b>8</b>    |
| Supplementary References                                                                                                                                                                                                 | <b>9–10</b> |

**Supplementary Table 1. Phase II/Phase III/Approval Conversion Rates.**

|                                                                                                                                                                                                                                                                                                                                                                                                                                                                                                                                                                                                                                                                                                                                                                                                                                                                                                                                                                                                                                                                                                                                                                                                                                                                                                                                                                                                                                                                                                       | <b>Pharmaceutical<sup>1</sup></b> | <b>Cell Therapy<sup>2</sup></b> |
|-------------------------------------------------------------------------------------------------------------------------------------------------------------------------------------------------------------------------------------------------------------------------------------------------------------------------------------------------------------------------------------------------------------------------------------------------------------------------------------------------------------------------------------------------------------------------------------------------------------------------------------------------------------------------------------------------------------------------------------------------------------------------------------------------------------------------------------------------------------------------------------------------------------------------------------------------------------------------------------------------------------------------------------------------------------------------------------------------------------------------------------------------------------------------------------------------------------------------------------------------------------------------------------------------------------------------------------------------------------------------------------------------------------------------------------------------------------------------------------------------------|-----------------------------------|---------------------------------|
| <b>Phase II → Phase III</b>                                                                                                                                                                                                                                                                                                                                                                                                                                                                                                                                                                                                                                                                                                                                                                                                                                                                                                                                                                                                                                                                                                                                                                                                                                                                                                                                                                                                                                                                           | <b>26.5% (2482)</b>               | <b>10.2% (401)</b>              |
| <b>Phase III → Approval</b>                                                                                                                                                                                                                                                                                                                                                                                                                                                                                                                                                                                                                                                                                                                                                                                                                                                                                                                                                                                                                                                                                                                                                                                                                                                                                                                                                                                                                                                                           | <b>48.7% (731)</b>                | <b>14.3% (42)</b>               |
| <p><sup>1</sup>Annual report from BIO entitled "Clinical Development Success Rates 2006-2015 (June 2016), <b>pg. 20</b>.</p> <p><sup>2</sup>General search terms of "cell therapy/cellular therapeutic", "autologous", and "allogeneic" were used in order to develop a general clinical landscape of cell therapy products at Phase II and Phase III levels, using a time scope of 1/1/2006 to 12/31/2015. Each individual reported clinical trial was then evaluated as to whether the primary goal was the evaluation of a novel cellular therapy. Thus, any studies including cell therapies as secondary/tangent procedure or already approved therapy (BMT) were not included in our analysis. Trials included in this analysis include both academic-sponsored trials and corporate-sponsored trials, while the BIO report analysis includes only corporate-sponsored trials. Three categories were identified: 1) Cell therapy, 2) Not cell therapy, 3) Tandem cell therapy (roughly equivalent emphasis on cell therapy and additional therapy (ie. drugs)). Phase II Trial #s Cell therapy: 370, Not cell therapy: 945, Tandem: 31; Phase III Trial #s Cell therapy: 36, Not cell therapy: 205, Tandem: 6. Data for cell therapy includes combination trial data. These data were cross-referenced to FDA.gov website for approvals during that period.</p> <p>See Supplementary Data file for a list of Phase-II and Phase-III clinical trials that include the use of cell therapies.</p> |                                   |                                 |

**Supplementary Table 2:** Regulatory reference summary for cell therapy manufacturing

|                                         | US                                                                                                                                                                                                                                                                                                                                                                                                              | EU                                                                                                                                                                                                                                                                                                       |
|-----------------------------------------|-----------------------------------------------------------------------------------------------------------------------------------------------------------------------------------------------------------------------------------------------------------------------------------------------------------------------------------------------------------------------------------------------------------------|----------------------------------------------------------------------------------------------------------------------------------------------------------------------------------------------------------------------------------------------------------------------------------------------------------|
| Regulatory Agency                       | Office of Tissues and Advanced Therapies/ Center for Biologics Evaluation and Research (CBER)/ Food and Drug Administration (FDA)                                                                                                                                                                                                                                                                               | European Medicines Agency (EMA)                                                                                                                                                                                                                                                                          |
| Governing Regulations                   | 21 CFR 1271 - Human Cells, Tissues, and Cellular and Tissue-Based Products<br>21 CFR 600 - Biologic Products: General<br>21 CFR 610 - General Biological Products Standards                                                                                                                                                                                                                                     | Directive 2001/83/EC - Medicinal Products for Human Use<br>EC 1394/2007 - Advanced Therapy Medicinal Products ("ATMP", amends 2001/83/EC)<br>Directive 2004/23/EC - Quality and safety for donation, procurement, testing, processing, preservation, storage and distribution of human tissues and cells |
| Good Manufacturing Practice Regulations | 21 CFR 210 - Current GMP in Manufacturing, Processing, Packing, or Holding of Drugs, General<br>21 CFR 211 - Current GMP for Finished Pharmaceuticals                                                                                                                                                                                                                                                           | Directive 2003/94/EC - GMP for medicinal products for human use                                                                                                                                                                                                                                          |
| Key guidances                           | FDA/CBER - Content and Review of Chemistry, Manufacturing, and Control (CMC) information for Human Somatic Cell Therapy Investigational New Drug Applications (INDs)<br>FDA/CBER - Current Good Tissue Practice (CGTP) and Additional Requirements for Manufacturers of Human Cells, Tissues, and Cellular and Tissue-Based Products (HCT/Ps)<br>FDA/CBER - Potency Test for Cellular and Gene Therapy Products | EudraLex - Volume 4 - GMP guidelines                                                                                                                                                                                                                                                                     |
| Internationally harmonized guidances    | ICH Q6B - Specifications: Test Procedures and Acceptance Criteria for Biotechnological/Biological Products<br>ICH Q8 (R2) - Pharmaceutical Development (establishes QbD)<br>ICH Q9 - Quality Risk Management<br>ICH Q10 - Pharmaceutical Quality System                                                                                                                                                         |                                                                                                                                                                                                                                                                                                          |

Note: While manufacture of cell-based products are excluded from some guidances, the principles are generally applicable

**Supplementary Table 3:** Descriptive summary of quality attributes for cell therapy products

| Attribute Category     | Description                                                                                                                                                                                                                                          |
|------------------------|------------------------------------------------------------------------------------------------------------------------------------------------------------------------------------------------------------------------------------------------------|
| Identity               | One or more cell phenotypes that are expected to provide the targeted efficacy of the CTP, analogous to active pharmaceutical ingredient.                                                                                                            |
| Cellular purity        | Closely linked to identity. Cellular impurities include other cell phenotypes, non-viable cells, cell aggregates, or cell debris, that are extraneous and not expected to contribute to efficacy or even could be harmful to the CTP or the patient. |
| Acellular impurities   | Extraneous residual materials from the manufacturing process, such as endotoxin, culture reagents, serum, cytokines, antibiotics, particulate.                                                                                                       |
| Potency                | Measure of one or more relevant biological activities that contribute to the targeted efficacy of the CTP, at least related to mechanism of action (MOA) and ideally clinical efficacy.                                                              |
| Cell Number/Viability  | Quantity and percentage of viable cells in each dose. Often linked to potency and/or identity                                                                                                                                                        |
| Microbiological Safety | Absence of microbial contaminants including bacteria, fungal, mycoplasma, and viral organisms                                                                                                                                                        |

**Supplementary Table 4:** Examples of Cell Therapeutics and Their Corresponding Potency Testing

| CTP          | Description                                                      | Potency                                                                                             | Indication                      | Putative MoA                                                                      | Ref      |
|--------------|------------------------------------------------------------------|-----------------------------------------------------------------------------------------------------|---------------------------------|-----------------------------------------------------------------------------------|----------|
| Prochymal    | Allogeneic MSCs                                                  | Expression of secreted tumor necrosis factor receptor (sTNFR1)                                      | Graft vs. Host Disease          | Immunomodulation                                                                  | <u>3</u> |
| CD19-CAR-T   | Autologous mixture of CD19-CAR+ T cells and residual CD45+ cells | Cytolysis of CD19-expressing cells                                                                  | ALL                             | CD107a degranulation in response to CD19+ target cells                            | <u>1</u> |
| Ixmyelocel-T | Autologous mixture of CD90+ stromal cells and CD45+ cells        | Decreased secretion of pro-inflammatory stimuli, expression of CD206 and CD163, phagocytic activity | Ischemic cardiovascular disease | Promotion of angiogenesis, immune modulation, and tissue repair                   | <u>1</u> |
| Treg         | Autologous Treg                                                  | Suppression of T effector cells; Suppression of IFN- $\gamma$ secretion                             | Type 1 diabetes (autoimmunity)  | Restoration of immune balance between effector and regulatory T cell functions    | <u>2</u> |
| Amorcyte     | Autologous CD34+ hematopoietic progenitor cells                  | Quantity of CD34+ cells, SDF-1 mediated cell migration                                              | Myocardial infarction           | Migration of CD34 cells into affected region and prevention of adverse remodeling | <u>3</u> |

**Supplementary Table 5:** Current challenges associated with the integration of microcarriers into MSC manufacturing.

|                                       | Benefit                                                                                                                                                                                                                                                                                                                                                        | Challenge                                                                                                                                                                                             | Potential Mitigation                                                                                                                                         |
|---------------------------------------|----------------------------------------------------------------------------------------------------------------------------------------------------------------------------------------------------------------------------------------------------------------------------------------------------------------------------------------------------------------|-------------------------------------------------------------------------------------------------------------------------------------------------------------------------------------------------------|--------------------------------------------------------------------------------------------------------------------------------------------------------------|
| Product Comparability                 | <p>Reduced labor requirements and ability to implement automated process steps.</p> <p>Stirred bioreactors are well characterized, allowing for changes in scale to be assessed prior to implementation <sup>4</sup>.</p> <p>Reduction in required clean room capacity and equipment (incubators etc.) allowing for facility and operational cost savings.</p> | <p><b>Quality:</b> High risk of changes in MSC product efficacy when moving from existing planar technology to microcarrier-based process.</p>                                                        | <p>Development of quality assays of product efficacy.</p>                                                                                                    |
| Product Yield (per bioreactor volume) | <p>Ability to manufacture <math>&gt;10^9</math> cells to provide <math>&gt;4000</math> doses per batch compared with <math>&lt;10^8</math> cells to provide <math>&lt;400</math> doses per batch in planar culture technology, reducing cost of goods <sup>5</sup>.</p>                                                                                        | <p><b>Cost of Goods:</b> Increased MSC number per batch reduces the cost per dose.</p>                                                                                                                | <p>Development and optimization of culture medium and process parameters.</p>                                                                                |
| Harvest                               | <p>Reduction in batch pooling and product holding times, improving process scalability and product quality attributes <sup>6</sup>.</p>                                                                                                                                                                                                                        | <p><b>Quality:</b> Increased agitation rate during detachment reduces product quality.</p> <p><b>Cost of Goods:</b> Increased detachment efficiency and MSCs per batch reduces the cost per dose.</p> | <p>Development of MSC detachment protocols prior to implementation at scale <sup>7, 8</sup>.</p>                                                             |
| Separation                            | <p>Improved integration of up- and downstream unit operations, reducing process time and improving scalability.</p>                                                                                                                                                                                                                                            | <p><b>Quality:</b> Method of separation may affect MSC CQAs.</p> <p><b>Scalability:</b> Process should allow for timely separation, even at large scale.</p>                                          | <p>Development of scale-down models to test product CQAs <sup>9</sup> and downstream processing times early in development <sup>10</sup>.</p>                |
| Process Optimization                  | <p>Homogeneous environment allows for monitoring and control of key process parameters such as dissolved oxygen, pH, nutrients and metabolites <sup>11</sup>.</p> <p>Bioreactor systems allow for flexible modes of operation such as batch, fed-batch or perfusion, allowing for process development activities to improve product quality and yield.</p>     | <p><b>Quality:</b> Impact on MSC product CQAs.</p> <p><b>Scalability:</b> Limit to process scale.</p>                                                                                                 | <p>Integration of effective process control systems, media optimization and consideration of direct aeration methods <sup>12</sup> in early development.</p> |
| Purification                          | <p>Closed system manufacture, reducing</p>                                                                                                                                                                                                                                                                                                                     | <p><b>Quality:</b> Increase in rate</p>                                                                                                                                                               | <p>Integration of</p>                                                                                                                                        |

|            |                                                                 |                                                                                                                                                                                                                                          |                                                                                                                                        |
|------------|-----------------------------------------------------------------|------------------------------------------------------------------------------------------------------------------------------------------------------------------------------------------------------------------------------------------|----------------------------------------------------------------------------------------------------------------------------------------|
|            | the risk associated with contamination and failed product lots. | of failed lots due to impurities.                                                                                                                                                                                                        | particulate and impurity levels as a screening criteria for development of downstream separation and volume reduction processes.       |
| Attachment |                                                                 | <p><b><u>Sustainability:</u></b><br/>Reducing the amount of serum is critical in increasing large-scale sustainability.</p> <p><b><u>Cost of Goods:</u></b><br/>Reduced attachment reduces growth rate and number of MSCs per batch.</p> | Development of reduced or serum-free process including methods for microcarrier modification to improve MSC attachment <sup>10</sup> . |

**Supplementary Table 6: Comparison of microencapsulation techniques, materials and their scalability.**

| Encapsulation Technique | Scalability    | Production Rate                                                                                                              | Material                                 | Characterization                                                                                                       | Ref            |
|-------------------------|----------------|------------------------------------------------------------------------------------------------------------------------------|------------------------------------------|------------------------------------------------------------------------------------------------------------------------|----------------|
| Extrusion               | Medium to high | Coaxial air flow: $10^2$ part./s<br>Electrostatics: $10^5$ part./s<br>Vibration: $10^3$ part./s<br>JetCutter: $10^4$ part./s | Alginate                                 | <i>In vitro</i> , rodent, dog, nonhuman primate, human                                                                 | 13-25          |
| Emulsion                | High           | Depends on vessel size                                                                                                       | PEG/PEGDA<br><br>Alginate<br><br>Agarose | <i>In vitro</i> , rodent, nonhuman primate, human<br><br><i>In vitro</i> , rodent<br><br><i>In vitro</i> , rodent, dog | 26-35<br>36-38 |
| Microfluidic            | Medium         | $10^4$ particles/s                                                                                                           | Alginate<br>PEG                          | <i>In vitro</i> , rodent                                                                                               | 39, 40         |
| Bioprinting             | Low to medium  | $10^5$ particles/s                                                                                                           | Alginate                                 | <i>In vitro</i>                                                                                                        |                |
| Surface coat            | Low            | Depends on coating method                                                                                                    | PEG/PEGDA                                | <i>In vitro</i> , rodent, human                                                                                        | 41-43          |

## SUPPLEMENTARY REFERENCES

1. Kalos, M. et al. T cells with chimeric antigen receptors have potent antitumor effects and can establish memory in patients with advanced leukemia. *Sci Transl Med* **3**, 95ra73 (2011).
2. Trzonkowski, P., Szarynska, M., Mysliwska, J. & Mysliwski, A. Ex vivo expansion of CD4(+)CD25(+) T regulatory cells for immunosuppressive therapy. *Cytometry A* **75**, 175-188 (2009).
3. Quyyumi, A.A. et al. CD34(+) cell infusion after ST elevation myocardial infarction is associated with improved perfusion and is dose dependent. *Am Heart J* **161**, 98-105 (2011).
4. Rafiq, Q.A., Brosnan, K.M., Coopman, K., Nienow, A.W. & Hewitt, C.J. Culture of human mesenchymal stem cells on microcarriers in a 5 l stirred-tank bioreactor. *Biotechnology letters* **35**, 1233-1245 (2013).
5. Rowley, J., Abraham, E., Campbell, A., Brandwein, H. & Oh, S. Meeting Lot-Size Challenges of Manufacturing Adherent Cells for Therapy. *BioProcess International* **10**, 16-22 (2012).
6. Pal, R., Hanwate, M. & Totey, S.M. Effect of holding time, temperature and different parenteral solutions on viability and functionality of adult bone marrow-derived mesenchymal stem cells before transplantation. *Journal of tissue engineering and regenerative medicine* **2**, 436-444 (2008).
7. Nienow, A.W., Rafiq, Q.A., Coopman, K. & Hewitt, C.J. A potentially scalable method for the harvesting of hMSCs from microcarriers. *Biochemical Engineering Journal* **85**, 79-88 (2014).
8. Nienow, A.W. et al. Agitation conditions for the culture and detachment of hMSCs from microcarriers in multiple bioreactor platforms. *Biochemical Engineering Journal* **108**, 24-29 (2016).
9. Masri, M.F., Lawrence, K., Wall, I. & Hoare, M. An ultra scale-down methodology to characterize aspects of the response of human cells to processing by membrane separation operations. *Biotechnology and Bioengineering*, n/a-n/a (2017).
10. Heathman, T.R. et al. Expansion, harvest and cryopreservation of human mesenchymal stem cells in a serum-free microcarrier process. *Biotechnology and bioengineering* **112**, 1696-1707 (2015).
11. Kirouac, D.C. & Zandstra, P.W. The systematic production of cells for cell therapies. *Cell stem cell* **3**, 369-381 (2008).
12. Nienow, A.W. Reactor engineering in large scale animal cell culture. *Cytotechnology* **50**, 9-33 (2006).
13. Soon-Shiong, P. et al. Insulin independence in a type 1 diabetic patient after encapsulated islet transplantation. *The Lancet* **343**, 950-951 (1994).
14. Calafiore, R. et al. Microencapsulated pancreatic islet allografts into nonimmunosuppressed patients with type 1 diabetes. *Diabetes care* **29**, 137-138 (2006).
15. Narang, A.S. & Mahato, R.I. Biological and biomaterial approaches for improved islet transplantation. *Pharmacological reviews* **58**, 194-243 (2006).
16. Duvivier-Kali, V.F., Omer, A., Parent, R.J., O'Neil, J.J. & Weir, G.C. Complete protection of islets against allojection and autoimmunity by a simple barium-alginate membrane. *Diabetes* **50**, 1698-1705 (2001).
17. Van Raamsdonk, J., Cornelius, R., Brash, J. & Chang, P. Deterioration of polyamino acid-coated alginate microcapsules in vivo. *Journal of Biomaterials Science, Polymer Edition* **13**, 863-884 (2002).
18. Omer, A. et al. Long-term normoglycemia in rats receiving transplants with encapsulated islets. *Transplantation* **79**, 52-58 (2005).
19. Tuch, B.E. et al. Safety and viability of microencapsulated human islets transplanted into diabetic humans. *Diabetes care* **32**, 1887-1889 (2009).
20. Vaithilingam, V. et al. Effect of prolonged gelling time on the intrinsic properties of barium alginate microcapsules and its biocompatibility. *Journal of microencapsulation* **28**, 499-507 (2011).
21. Vegas, A.J. et al. Combinatorial hydrogel library enables identification of materials that mitigate the foreign body response in primates. *Nat Biotechnol* **34**, 345-352 (2016).
22. Vegas, A.J. et al. Long-term glycemic control using polymer-encapsulated human stem cell-derived beta cells in immune-competent mice. *Nat Med* **22**, 306-311 (2016).
23. Poncelet, D. et al. Production of alginate beads by emulsification/internal gelation. I. Methodology. *Applied Microbiology and Biotechnology* **38**, 39-45 (1992).
24. Hoesli, C.A. et al. Pancreatic cell immobilization in alginate beads produced by emulsion and internal gelation. *Biotechnology and bioengineering* **108**, 424-434 (2011).
25. Hoesli, C.A. et al. Reversal of diabetes by  $\beta$ TC3 cells encapsulated in alginate beads generated by emulsion and internal gelation. *Journal of Biomedical Materials Research Part B: Applied Biomaterials* **100**, 1017-1028 (2012).
26. Zhang, Y. & Ma, M. in *Microscale Technologies for Cell Engineering* 231-248 (Springer, 2016).
27. Contreras, J.L. et al. A novel approach to xenotransplantation combining surface engineering and genetic modification of isolated adult porcine islets. *Surgery* **136**, 537-547 (2004).

28. Lee, D.Y., Nam, J.H. & Byun, Y. Functional and histological evaluation of transplanted pancreatic islets immunoprotected by PEGylation and cyclosporine for 1 year. *Biomaterials* **28**, 1957-1966 (2007).
29. Cruise, G.M., Hegre, O.D., Scharp, D.S. & Hubbell, J.A. A sensitivity study of the key parameters in the interfacial photopolymerization of poly (ethylene glycol) diacrylate upon porcine islets. *Biotechnology and bioengineering* **57**, 655-665 (1998).
30. Teramura, Y., Oommen, O.P., Olerud, J., Hilborn, J. & Nilsson, B. Microencapsulation of cells, including islets, within stable ultra-thin membranes of maleimide-conjugated PEG-lipid with multifunctional crosslinkers. *Biomaterials* **34**, 2683-2693 (2013).
31. Lin, C.-C. & Anseth, K.S. Glucagon-like peptide-1 functionalized PEG hydrogels promote survival and function of encapsulated pancreatic  $\beta$ -cells. *Biomacromolecules* **10**, 2460-2467 (2009).
32. Kizilel, S. et al. Encapsulation of pancreatic islets within nano-thin functional polyethylene glycol coatings for enhanced insulin secretion. *Tissue Engineering Part A* **16**, 2217-2228 (2010).
33. Leslie-Barbick, J.E., Saik, J.E., Gould, D.J., Dickinson, M.E. & West, J.L. The promotion of microvasculature formation in poly (ethylene glycol) diacrylate hydrogels by an immobilized VEGF-mimetic peptide. *Biomaterials* **32**, 5782-5789 (2011).
34. Kin, T. et al. Xenotransplantation of pig islets in diabetic dogs with use of a microcapsule composed of agarose and polystyrene sulfonic acid mixed gel. *Pancreas* **25**, 94-100 (2002).
35. Gazda, L.S. et al. Encapsulation of porcine islets permits extended culture time and insulin independence in spontaneously diabetic BB rats. *Cell Transplant* **16**, 609-620 (2007).
36. Leung, A. et al. Emulsion strategies in the microencapsulation of cells: pathways to thin coherent membranes. *Biotechnology and bioengineering* **92**, 45-53 (2005).
37. Basta, G. et al. Method for fabrication of coherent microcapsules: A new, potential immunoisulatory barrier for pancreatic islet transplantation. *Diabetes, nutrition & metabolism* **8**, 105-112 (1995).
38. Calafiore, R. & Basta, G. in *Cell encapsulation technology and therapeutics* 138-150 (Springer, 1999).
39. Jun, Y. et al. Microfluidics-generated pancreatic islet microfibers for enhanced immunoprotection. *Biomaterials* **34**, 8122-8130 (2013).
40. Tomei, A.A. et al. Device design and materials optimization of conformal coating for islets of Langerhans. *Proceedings of the National Academy of Sciences* **111**, 10514-10519 (2014).
41. Lee, D.Y., Park, S.J., Lee, S., Nam, J.H. & Byun, Y. Highly poly(ethylene) glycolylated islets improve long-term islet allograft survival without immunosuppressive medication. *Tissue Eng* **13**, 2133-2141 (2007).
42. Wyman, J.L. et al. Immunoisolating pancreatic islets by encapsulation with selective withdrawal. *Small* **3**, 683-690 (2007).
43. Lee, D.Y., Park, S.J., Nam, J.H. & Byun, Y. A combination therapy of PEGylation and immunosuppressive agent for successful islet transplantation. *J Control Release* **110**, 290-295 (2006).
